# Supplementary material for: Identification of Differentially Methylated Regions Associated with a Knockout of SUV39H1 in Prostate Cancer Cells
Source: MDPI journal article supplement (doi:10.3390/genes11101188), 2020-10-13
Supplement: s1 [file s1]

Supplementary Figure 1.

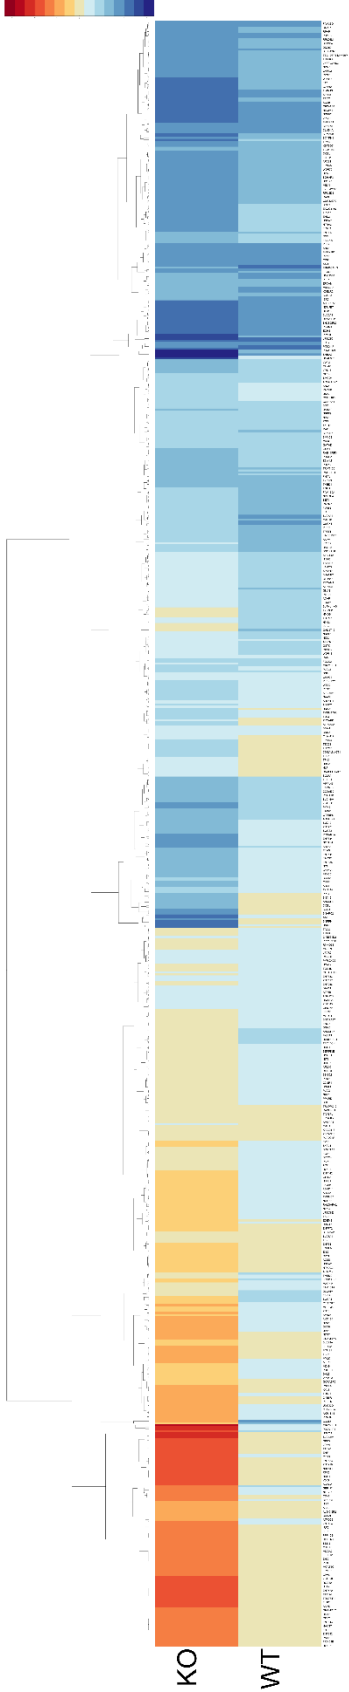

**Legend:**

**Heatmap of genes showing different levels of methylation at the promoter regions and different levels of expression between WT and SUV39H1\_KO cells.** The methylation profile was compared with the RNASeq data from the WT and SUV39H1\_KO cells and 980 genes were showing differences both in the levels of methylation at the promoter regions and the levels of expression between WT and KO cells.
